# Supplementary material
Source: PubMed Central journal article supplement (PMC4524035)
Supplement: JB.00182-15_zjb999093711so4.pdf [file JB.00182-15_zjb999093711so4.pdf]

**Table S1. Strains, plasmids, and primers used in this study.**

| Strain name                              | Strain description                                                 | Ref. no. | Source / Reference |
|------------------------------------------|--------------------------------------------------------------------|----------|--------------------|
| <b><i>P. aeruginosa</i></b>              |                                                                    |          |                    |
| PAO1 WT                                  | Wild-type                                                          | DH1856   | (1)                |
| PAO1 $\Delta anr$                        | In-frame deletion of <i>anr</i>                                    | DH2399   | This study         |
| PAO1-R1                                  | PAO1 <i>lasR</i> :Tc                                               | DH2400   | (2)                |
| PA14 WT                                  | Wild-type                                                          | DH122    | (3)                |
| PA14 $\Delta anr$                        | In-frame deletion of <i>anr</i>                                    | DH1977   | L. Dietrich        |
| PA14 $\Delta lasR$                       | In-frame deletion of <i>lasR</i>                                   | DH164    | (4)                |
| PA14 $\Delta lasR \Delta anr$            | In-frame deletions of <i>lasR</i> , <i>anr</i>                     | DH2401   | This study         |
| PA14 $\Delta lasR rhIR$ :Tc              | In-frame deletion of <i>lasR</i> ; gene replacement of <i>rhIR</i> | DH237    | (5)                |
| PA14 $\Delta lasR rhIR$ :Tc $\Delta anr$ | In-frame deletion of <i>anr</i> in DH237                           | DH2402   | This study         |
| PA14 $\Delta lasI$                       | In-frame deletion of <i>lasI</i>                                   | DH132    | (4)                |
| J215                                     | CF clinical isolate                                                | DH2403   | This study         |
| J215 $\Delta anr$                        | In-frame deletion of <i>anr</i>                                    | DH2404   | This study         |
| J215 $\Delta anr+anr$                    | Complementation of <i>anr</i> at native locus                      | DH2405   | This study         |
| J215 $\Delta cgrC$                       | In-frame deletion of <i>cgrC</i>                                   | DH2406   | This study         |
| J215 $\Delta cupA2$                      | In-frame deletion of <i>cupA2</i>                                  | DH2407   | This study         |
| J215 $\Delta PA2133$                     | In-frame deletion of PA2133                                        | DH2408   | This study         |
| J215 $\Delta dnr$                        | In-frame deletion of <i>dnr</i>                                    | DH2409   | This study         |
| J215 $\Delta anr \Delta antA$            | In-frame deletion of <i>antA</i> in DH2404                         | DH2410   | This study         |
| J215 $\Delta PhrS$                       | In-frame deletion of PhrS                                          | DH2411   | This study         |
| J215 <i>pqsA</i> :TnMar                  | Mariner transposon inserted into <i>pqsA</i>                       | DH2412   | This study         |
| J215 <i>pqsB</i> :TnMar                  | Mariner transposon inserted into <i>pqsB</i>                       | DH2413   | This study         |
| J215 <i>pqsH</i> :TnMar                  | Mariner transposon inserted into <i>pqsH</i>                       | DH2414   | This study         |
| NC-AMT0101-1                             | CF clinical isolate with frame-shift mutation in <i>lasR</i>       | DH2415   | (6)                |
| NC-AMT0101-1 $\Delta anr$                | In-frame deletion of <i>anr</i> in DH2415                          | DH2416   | This study         |
| NC-AMT0101-2                             | CF clinical isolate. Parent of NC-AMT0101-1                        | DH2417   | (6)                |
| NC-AMT0101-2 $\Delta anr$                | In-frame deletion of <i>anr</i> in DH2417                          | DH2418   | This study         |

|                              |                                                                                                   |        |                |
|------------------------------|---------------------------------------------------------------------------------------------------|--------|----------------|
| AMT0047-3                    | CF clinical isolate with substitution in <i>lasR</i> resulting in STOP                            | DH1132 | (6)            |
| AMT0047-2                    | CF clinical isolate. Parent of AMT0047-3                                                          | DH1133 | (6)            |
| <b><i>E. coli</i></b>        |                                                                                                   |        |                |
|                              | SM10 $\lambda$ pir                                                                                | DH2419 |                |
| <b><i>S. aureus</i></b>      |                                                                                                   |        |                |
|                              | 8325-4                                                                                            | DH2420 |                |
| <b>Plasmids</b>              |                                                                                                   |        |                |
| pMQ30                        | Shuttle vector for yeast cloning and Gram-negative allelic replacement; Gm <sup>R</sup>           |        | (7)            |
| <i>anr</i> _del_pMQ30        | For deleting <i>anr</i> ; Gm <sup>R</sup>                                                         |        | This study     |
| <i>anr</i> _KON_pMQ30        | For inserting <i>anr</i> at the native locus; Gm <sup>R</sup>                                     |        | This study     |
| pEXG2- $\Delta$ <i>cupA2</i> | For deleting <i>cupA2</i> ; Gm <sup>R</sup>                                                       |        | S. Dove        |
| pEXG2- $\Delta$ <i>cgrC</i>  | For deleting <i>cgrC</i> ; Gm <sup>R</sup>                                                        |        | (1)            |
| <i>dnr</i> _del_pMQ30        | For deleting <i>dnr</i> ; Gm <sup>R</sup>                                                         |        | (8)            |
| pEXG2- $\Delta$ PA2133       | For deleting PA2133; Gm <sup>R</sup>                                                              |        | S. Dove        |
| pMQ70                        | Shuttle vector for yeast cloning and for arabinose-inducible gene expression; Amp <sup>R</sup>    |        | (7)            |
| <i>cgrABC</i> -pMQ70         | For expressing <i>cgrABC</i> ; Amp <sup>R</sup>                                                   |        | This study     |
| pMQ123                       | Shuttle vector for yeast cloning and for IPTG-inducible gene expression; Amp <sup>R</sup>         |        | (7)            |
| <i>anr</i> -pMQ123           | For over-expressing <i>anr</i> ; Amp <sup>R</sup>                                                 |        | (8)            |
| <i>anr</i> D149A-pMQ123      | For over-expressing oxygen insensitive <i>anr allele</i> D149A; Amp <sup>R</sup>                  |        | This study     |
| pBT20                        | Vector carrying <i>mariner</i> transposon; Ap <sup>R</sup> Gm <sup>R</sup> (marker on transposon) |        | (9)            |
| pMQ72                        | Shuttle vector for yeast cloning and for arabinose-inducible gene expression; Gm <sup>R</sup>     |        | (7)            |
| <i>gcbC</i> E429R-pMQ72      | For over-expressing hyperactive allele of DGC <i>gcbC</i> ; Gm <sup>R</sup>                       |        | G.A<br>O'Toole |
| <i>gcbC</i> R366E-pMQ72      | For over-expressing hyperactive allele of DGC <i>gcbC</i> ; Gm <sup>R</sup>                       |        | G.A<br>O'Toole |

| <b>Primers</b>          | <b>Primer sequence (5'-3')<sup>a</sup></b>                          |
|-------------------------|---------------------------------------------------------------------|
| <i>lasI</i> _Seq_1      | GCTCCAGAAAGTTTCCTGGCTTTCCC                                          |
| <i>lasI</i> _Seq_2      | GAGTCCGGAGCGGGTCCGAC                                                |
| <i>lasR</i> _Seq_1      | CAAACGCTGCGGTCTATTGTTAAGTG                                          |
| <i>lasR</i> _Seq_2      | CAGTCGTTTCGAGAATGGCGAGAAC                                           |
| <i>rhII</i> _Seq_1      | CTGGCTGCCGCCTACGCC                                                  |
| <i>rhII</i> _Seq_2      | GCGGCCAAATCCCGGAATGCAG                                              |
| <i>rhIIR</i> _Seq_1     | CAACCGCACAGTATCGCTTGCG                                              |
| <i>rhIIR</i> _Seq_2     | CTCTCAGTCGGAGGACATAACCAGC                                           |
| <i>anr</i> _KO_pMQ30_1  | tgcggttctgatttaactctgtatcaggctgaTGTTTCATGAACTGGGTCATGAA<br>GGGTTGGC |
| <i>anr</i> _KO_pMQ30_2  | GTGCCTTTAACCTAGCAAGGACCCCTCAAGCGCCTGCGAA<br>CCGCCAAC                |
| <i>anr</i> _KO_pMQ30_3  | GTTGGCGGTTTCGCAGGCGCTTGAGGGGTCCTTGCTAGGTT<br>AAAGGCAC               |
| <i>anr</i> _KO_pMQ30_4  | tgagcggataacaatttcacacaggaaacagctatgTCTGCCACTTCGAACT<br>GGCCTTCG    |
| pMQ70_ <i>cgrABC</i> _1 | tctgtatcaggctgaaaatcttctctcatccgccCTACTCCCAGGAGCGGGA<br>ATACACG     |
| pMQ70_ <i>cgrABC</i> _2 | cgttttttgggctagcccaaggaagcacaaccATGGCAGGCAAGCATTAC<br>CAGGATGC      |
| <i>anr</i> _pMQ123_1    | ccgccaacacagccaagcttgcatgcctgcagactagtTCAGCCTTCCAGCT<br>GGCCGCC     |
| <i>anr</i> _pMQ123_2    | ctagcgaattcgagctcggatcccggggaaggagatatacatATGGCCGAAAC<br>CATCAAG    |
| <i>antA</i> _KO_pMQ30_1 | agaccgcttctgcgttctgatttaactctgtatcaggctgaCAGCAGGTAGTGCG<br>GCGGGC   |
| <i>antA</i> _KO_pMQ30_2 | GCGGTAAGTGCAGTCCGGCGTGCGTTCTCACCTTGTGCGT<br>TGTC                    |
| <i>antA</i> _KO_pMQ30_3 | GACAACGCACAAGGGTGAGAACGCACGCCGGACTGCAGTA<br>CCGC                    |
| <i>antA</i> _KO_pMQ30_4 | cacaggaaacagctatggcggtgcgagcagttcctgggtcTGCGGATTCGGC<br>CGGTTGGC    |

PhrS\_KO\_pMQ30\_1 agaccgcttctgcgcttctgatttaatctgtatcaggctgaCCTGCATCGACGCCG  
GATCG

PhrS\_KO\_pMQ30\_2 GCGCCTCGCTAATCTGAGCCCGCGCCTGGAAAAACACCGG  
CG

PhrS\_KO\_pMQ30\_3 CGCCGGTGTTTTTCCAGGCGCGGGCTCAGATTAGCGAGGC  
GC

PhrS\_KO\_pMQ30\_4 ttgtgagcggataacaatttcacacaggaacagctatgCGGCCTTGCGGCG  
TAGTAACC

<sup>a</sup> In primer sequences, upper case letters indicate *Pseudomonas*-specific genomic sequence, and lower case letters indicate sequence identity to the cloning vector.

**Table S2. Mutations in quorum sensing-related genes in J215.**  
From cycle sequencing.

| Gene        | Sequence Difference from PAO1                                                                                                                                                                                                                                                                                                                                                |
|-------------|------------------------------------------------------------------------------------------------------------------------------------------------------------------------------------------------------------------------------------------------------------------------------------------------------------------------------------------------------------------------------|
| <i>lasR</i> | Nonsynonymous mutation 588G → T ( <b>E196D</b> ) <sup>a</sup>                                                                                                                                                                                                                                                                                                                |
| <i>lasI</i> | Synonymous mutation 432 C → T                                                                                                                                                                                                                                                                                                                                                |
| <i>rhIR</i> | Synonymous mutation 147 C → T<br>Synonymous mutation 426 C → T<br>Synonymous mutation 453 C → A<br>Synonymous mutation 591 T → C<br>Synonymous mutation 717 T → C                                                                                                                                                                                                            |
| <i>rhII</i> | Synonymous mutation 105 C → T<br>Synonymous mutation 138 A → G<br>Nonsynonymous mutation 184 A → G ( <b>S62G</b> )<br>Synonymous mutation 196 C → T<br>Synonymous mutation 207 C → T<br>Synonymous mutation 217 C → T<br>Nonsynonymous mutation 249 C → A ( <b>D82E</b> )<br>Synonymous mutation 282 G → C<br>Synonymous mutation 312 C → T<br>Synonymous mutation 342 G → A |

<sup>a</sup> Indicates a previously identified loss-of-function mutation (10).

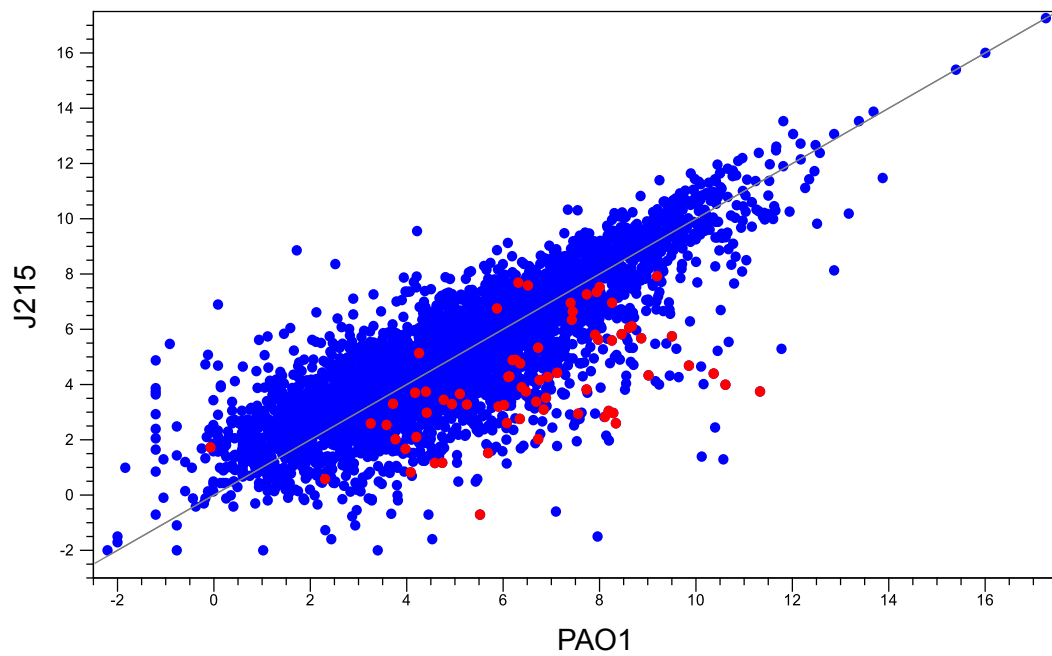

**FIG S1. Expression of LasR-controlled genes is reduced in J215 compared with PAO1.** Scatterplot of the number of reads for each *P. aeruginosa* transcript in J215 and PAO1. Reads were quantile normalized and log<sub>2</sub> transformed. Genes directly regulated by LasR as determined through LasR-ChIP experiments (11) are marked in red.

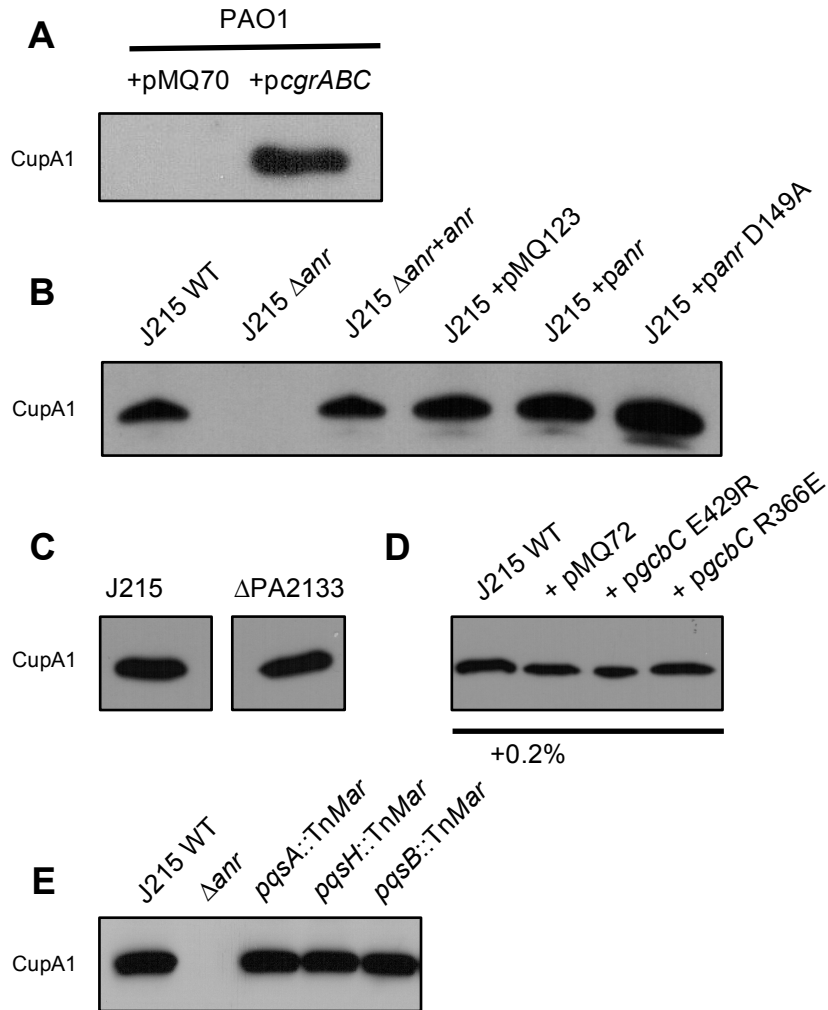

**FIG S2. Measurement of CupA1 production in PAO1 and J215.** Western blots of whole cell lysates from colony biofilms (A,E, : 3 days, B-D : 24 hours) grown in 1% O<sub>2</sub> (A, C-E) or 21% O<sub>2</sub> (B) on T-broth agar. **(A)** Production of fimbriae by PAO1 transformed with either a plasmid to overexpress *cgrABC* or with vector control pMQ70. **(B)** J215 transformed with constructs to express either wild-type *anr* or *anr* D149A, or with pMQ123 vector control. **(C)** Wild-type J215 and a phosphodiesterase PA2133 mutant. **(D)** J215 transformed with plasmids to express constitutively active alleles of *gcbC* from *Pseudomonas fluorescens* or with vector control pMQ72. Lane 3 showed less protein loading by coomassie stain. **(E)** J215 wild-type and  $\Delta anr$  compared with mutants in the HHQ/PQS biosynthetic pathway.

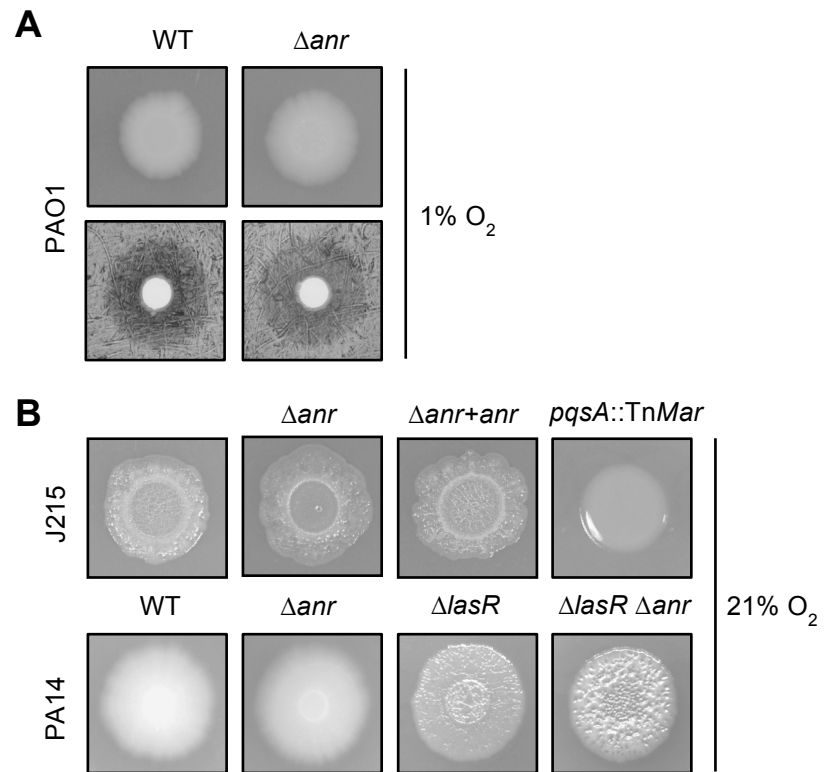

**FIG S3. Effects of Anr on HAQ production. (A)** Colony sheen and *S. aureus* inhibition by PAO1 and  $\Delta anr$  mutant. **(B)** HHQ sheen formed by  $\Delta anr$  mutants in either J215 or PA14  $\Delta lasR$  background in 21% O<sub>2</sub>.



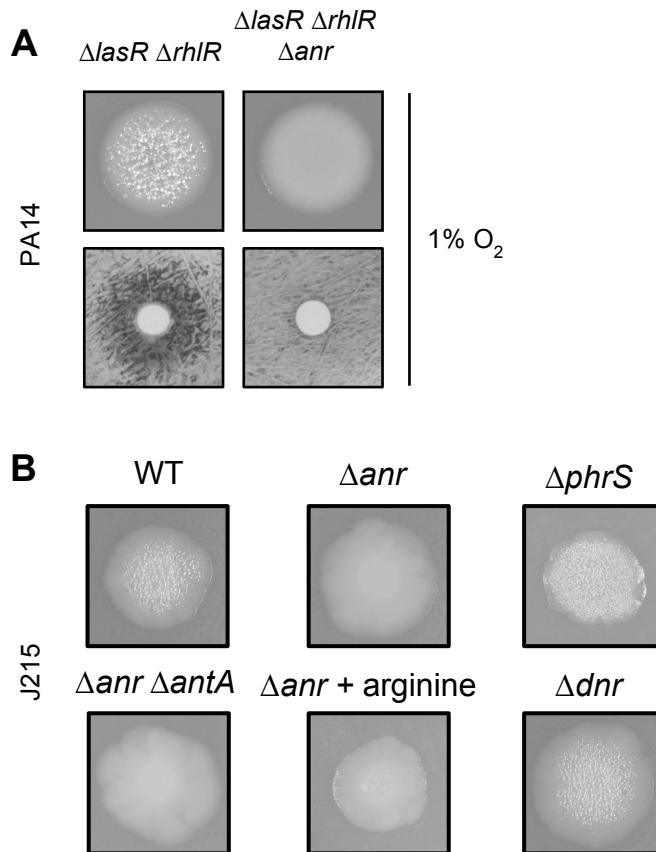

**FIG S4. The  $\Delta anr$  HAQ defect is not due to the activity of RhIR, Dnr, PhrS, or AntA, and is not rescued by excess arginine. (A) Colony morphology and *S. aureus* inhibition by PA14  $\Delta lasR \Delta rhIR$  and  $\Delta lasR \Delta rhIR \Delta anr$ . (B) J215 mutant colony morphologies. Arginine was supplied in the media at a concentration of 0.4% in the indicated panel.**

## SUPPLEMENTAL REFERENCES

1. **Vallet-Gely I, Sharp JS, Dove SL.** 2007. Local and global regulators linking anaerobiosis to *cupA* fimbrial gene expression in *Pseudomonas aeruginosa*. *J Bacteriol* **189**:8667-8676.
2. **Gambello MJ, Iglewski BH.** 1991. Cloning and characterization of the *Pseudomonas aeruginosa lasR* gene, a transcriptional activator of elastase expression. *J Bacteriol* **173**:3000-3009.
3. **Rahme LG, Stevens EJ, Wolfort SF, Shao J, Tompkins RG, Ausubel FM.** 1995. Common virulence factors for bacterial pathogenicity in plants and animals. *Science* **268**:1899-1902.
4. **Hogan DA, Vik A, Kolter R.** 2004. A *Pseudomonas aeruginosa* quorum-sensing molecule influences *Candida albicans* morphology. *Mol Microbiol* **54**:1212-1223.
5. **Cugini C, Morales DK, Hogan DA.** 2010. *Candida albicans*-produced farnesol stimulates *Pseudomonas* quinolone signal production in LasR-defective *Pseudomonas aeruginosa* strains. *Microbiology* **156**:3096-3107.
6. **Smith EE, Buckley DG, Wu Z, Saenphimmachak C, Hoffman LR, D'Argenio DA, Miller SI, Ramsey BW, Speert DP, Moskowitz SM, Burns JL, Kaul R, Olson MV.** 2006. Genetic adaptation by *Pseudomonas aeruginosa* to the airways of cystic fibrosis patients. *Proc Natl Acad Sci U S A* **103**:8487-8492.
7. **Shanks RM, Caiazza NC, Hinsa SM, Toutain CM, O'Toole GA.** 2006. *Saccharomyces cerevisiae*-based molecular tool kit for manipulation of genes from Gram-negative bacteria. *Appl Environ Microbiol* **72**:5027-5036.
8. **Jackson AA, Daniels EF, Hammond JH, Willger SD, Hogan DA.** 2014. The global regulator Anr represses PlcH phospholipase activity in *Pseudomonas aeruginosa* when oxygen is limiting. *Microbiology* doi:10.1099/mic.0.081158-0.
9. **Kulasekara HD, Ventre I, Kulasekara BR, Lazdunski A, Filloux A, Lory S.** 2005. A novel two-component system controls the expression of *Pseudomonas aeruginosa* fimbrial *cup* genes. *Mol Microbiol* **55**:368-380.
10. **Kohler T, Buckling A, van Delden C.** 2009. Cooperation and virulence of clinical *Pseudomonas aeruginosa* populations. *Proc Natl Acad Sci U S A* **106**:6339-6344.
11. **Gilbert KB, Kim TH, Gupta R, Greenberg EP, Schuster M.** 2009. Global position analysis of the *Pseudomonas aeruginosa* quorum-sensing transcription factor LasR. *Mol Microbiol* **73**:1072-1085.
